1 **Multiple Toll-Spätzle Pathways in *Drosophila melanogaster* Immunity**

2 Munmun Chowdhury<sup>1</sup>, Chun-Feng Li<sup>1,4</sup>, Zhen He<sup>1,2</sup>, Yuzhen Lu<sup>3</sup>, Xusheng Liu<sup>2</sup>,

3 Yufeng Wang<sup>2</sup>, Y. Tony Ip<sup>6</sup>, Michael R. Strand<sup>5\*</sup>, Xiao-Qiang Yu<sup>1,2,3\*</sup>

4

5 <sup>1</sup> Division of Cell Biology and Biophysics, School of Biological Sciences, University of

6 Missouri – Kansas City, Kansas City, MO 64110, USA

7 <sup>2</sup> School of Life Sciences, Central China Normal University, Wuhan 430079, China

8 <sup>3</sup> Guangzhou Key Laboratory of Insect Development Regulation and Application Research,

9 Institute of Insect Science and Technology & School of Life Sciences, South China

10 Normal University, Guangzhou 510631, China

11 <sup>4</sup> State Key Laboratory of Silkworm Genome Biology, Southwest University, Chongqing

12 400716, China

13 <sup>5</sup> Department of Entomology, University of Georgia, Athens, GA 30602, USA

14 <sup>6</sup> Program in Molecular Medicine, University of Massachusetts Medical School, Worcester,

15 MA 01605, USA

16

17 \* Correspondence should be addressed to: M.R. Strand (email: [mrstrand@uga.edu](mailto:mrstrand@uga.edu)) or X.Q.

18 Yu (email: [Yux@umkc.edu](mailto:Yux@umkc.edu))

19 **Running title:** Multiple Toll-Spätzle pathways

20 **Abstract**

21       The *Drosophila melanogaster* Toll-Spätzle pathway plays an important role in  
22 development and immunity. *Drosophila* genome encodes nine Toll receptors and six Spätzle  
23 (Spz) proteins, and only the canonical Toll-Spz (Toll-1-Spz-1) pathway has been well  
24 investigated. In this study, we compared the nine *Drosophila* Tolls and showed that similarly  
25 to Toll, Toll-7 also strongly activated *drosomycin* promoter. Importantly, we showed that  
26 both Toll and Toll-7 interacted with Spz, Spz-2 and Spz-5, and co-expression of Toll or  
27 Toll-7 with Spz, Spz-2 and Spz-5 activated the *drosomycin* promoter. Furthermore, Toll and  
28 Toll-7 both recognized *vesicular stomatitis virus* (VSV) by binding to the VSV glycoprotein.  
29 Septic infection in Toll and Toll-7 mutant flies suggested that Toll and Toll-7 differentially  
30 affected defense responses in adult males and females after systemic infection by  
31 *Enterococcus faecalis*, *Pseudomonas aeruginosa*, *Candida albicans* or VSV. Our results  
32 suggest multiple Toll family members activate the expression of antimicrobial peptides. Our  
33 results also provide evidence that Toll and Toll-7 bind multiple Spätzle proteins and  
34 differentially affect immune defense against different pathogens in adult male and female  
35 flies.

36

37

38 **Keywords:** Antimicrobial peptide/Innate immunity/Spätzle/Toll/*Vesicular stomatitis virus*

## 39 **Introduction**

40           The defense system in *Drosophila melanogaster* can discriminate among various  
41 microorganisms and express antimicrobial peptides (AMPs) in response to microbial  
42 infection [1,2]. A genetic analysis has revealed that the expression of AMPs is controlled by  
43 signaling pathways, such as the *spätzle/toll/tube/pelle/cactus* gene cassette, which controls for  
44 example *drosomycin* expression [3]. Toll (also called Toll-1) was first identified in  
45 *Drosophila* as the receptor that regulates the dorsal-ventral patterning in embryonic  
46 development [4] and was later found to be involved in the regulation of AMP genes in larvae  
47 and adult flies [3].

48           Since the discovery of *Drosophila* Toll, more than nine Toll-like receptors (TLRs)  
49 have been identified in humans and other vertebrate species. Tolls/TLRs are present in all  
50 metazoans [5] and mediate important physiological processes, such as inflammation, immune  
51 cell regulation, cell survival, and cell proliferation [6-8]. *Drosophila* Toll and mammalian  
52 TLRs share a common structural architecture with a conserved ectodomain composed of  
53 leucine-rich repeats (LRRs), a single-pass transmembrane domain, and a cytosolic  
54 Toll-interleukin-1 receptor homology (TIR) domain, which is also shared by members of the  
55 interleukin-1 receptor (IL-1R) family and the intracellular adaptor protein MyD88 [9,10].  
56 However, *Drosophila* Toll and mammalian TLRs show differences in their binding to  
57 ligands. *Drosophila* Toll binds to an endogenous protein ligand called Spätzle (Spz, also  
58 called Spz-1) [11,12], whereas mammalian TLRs directly recognize various  
59 pathogen-associated molecular patterns (PAMPs), such as bacterial lipopolysaccharide (LPS),

60 peptidoglycan (PGN), teichoic acid, flagella and CpG DNA, and viral single-stranded and  
61 double-stranded RNAs [13-15].

62 The *Drosophila* genome encodes nine Tolls [16,17] and six Spätzles [18], and only the  
63 functions of the canonical Toll-Spz (also called Toll-1-Spz-1) pathway in development and  
64 innate immunity have been well studied. *Drosophila* Toll-2 (18 wheeler, 18W), Toll-5  
65 (Tehao), Toll-8 (Tollo) and Toll-9 may play a role in immunity [16,19-23], Toll-6 and Toll-7  
66 function as neurotrophin receptors and interact genetically with the *Drosophila* neurotrophins  
67 DNT1 (Spz-2) and DNT2 (Spz-5) [24]. Toll-7 can recognize *vesicular stomatitis virus* (VSV)  
68 and induce antiviral autophagy independently of the canonical Toll pathway [25], but it is not  
69 required in the response to anti-VSV infection [26].

70 In *Drosophila*, Toll activation by Spz is transduced by the adaptor protein MyD88 (dMyD88)  
71 via Tube and Pelle kinases to induce the phosphorylation and subsequent degradation of the  
72 IκB inhibitor Cactus [27]. Cactus degradation frees the NF-κB factors Dif and/or Dorsal,  
73 which translocate(s) to the nucleus to activate the expression of AMP genes [28,29]. Spätzle  
74 is synthesized as a pro-protein with an N-terminal prodomain and a C-terminal active cystine  
75 knot domain (a.k.a. the cystine-knot family of growth factors), and the activation of pro-Spz  
76 requires proteolytic cleavage [30,31]. *Drosophila* pro-Spz (also called pro-Spz-1) is activated  
77 by a Spätzle-processing enzyme (SPE) to generate the cystine knot active Spz [32]. Active  
78 Spz dimers bind to two Toll receptors to trigger the downstream signaling pathway  
79 [12,33,34], but a direct interaction between different Toll and other Spz proteins has not yet  
80 been reported.

81           The cystine knot domains of Spz-2 to Spz-6 can be predicted based on their amino  
82 acid sequences, and these are located in the middle region of pro-Spz-2 and at the C-termini  
83 of pro-Spz-3 to pro-Spz-6, respectively (see Fig EV1A). However, the functions of Spz-2 to  
84 Spz-6 as ligands for the activation of the Toll pathway in *Drosophila* innate immunity have  
85 not yet been reported.

86           In this study, we report that in addition to Toll, *Drosophila* Toll-7 also strongly  
87 activated the *drosomycin* promoter. More importantly, we showed that Toll and Toll-7  
88 interacted with Spz, Spz-2 and Spz-5, and multiple pairs of Spz proteins with Toll or Toll-7  
89 activated the *drosomycin* promoter. Furthermore, Toll and Toll-7 both recognized VSV by  
90 binding to the VSV glycoprotein; Toll and Toll-7 differentially affected defense responses in  
91 adult male and female flies after systemic infection by *Enterococcus faecalis*, *Pseudomonas*  
92 *aeruginosa*, *Candida albicans* or VSV. Our results suggest multiple Toll family members  
93 activate the expression of antimicrobial peptides. Our results also provide evidence that Toll  
94 and Toll-7 bind multiple Spz proteins and differentially affect immune defense against  
95 different pathogens in adult male and female flies.

96

## 97 **Results**

### 98 **TIR domains of *Drosophila* Tolls activate the *drosomycin* but not the *diptericin* promoter** 99 **in S2 cells**

100           The *Drosophila* Toll-Spätzle (Toll-1-Spz-1) pathway is activated after the binding of  
101 the active Spz dimer to two Toll receptors. This binding triggers dimerization of the

102 intracellular TIR domains and their subsequent interaction with the adaptor protein dMyD88  
103 [35,36] to relay intracellular signals, which induce the translocation of the NF- $\kappa$ B factors  
104 Dorsal/Dif into the nucleus to activate AMP genes, such as *drosomycin* [28,29].

105 To test whether *Drosophila* Tolls serve as functional receptors in the activation of  
106 AMP genes, the TIR domains of *Drosophila* Toll to Toll-9 and *M. sexta* Toll [37], all contain  
107 only the intracellular domains (without the single-pass transmembrane domains), were  
108 overexpressed in S2 cells, and the activation of the *drosomycin* and *diptericin* promoters by  
109 TIR domains was assessed through dual luciferase assays because the overexpression of TIR  
110 domains can lead to the formation of TIR dimers/oligomers, which can recruit dMyD88 to  
111 trigger the downstream intracellular signaling pathway. Western blot results showed that the  
112 TIR domains of all ten Tolls were expressed in S2 cells (Fig 1A and B). In addition, dual  
113 luciferase assays showed that overexpression of the TIR domains from the nine *Drosophila*  
114 Tolls and *M. sexta* Toll activated the *drosomycin* promoter to certain extents, and increased  
115 promoter activity was observed with the TIR domains of Toll, Toll-7 and *M. sexta* Toll, but  
116 overexpression of the TIR domains from all ten Tolls did not activate the *diptericin* promoter  
117 (Fig 1C). These results suggested that all nine *Drosophila* Tolls play a role in immune  
118 signaling pathways and that Toll and Toll-7 might play a major role in these pathways. We  
119 focused on Toll and Toll-7 in our subsequent study as they can strongly activate the  
120 *drosomycin* promoter.

121 **The ectodomains of Toll and Toll-7 interact with multiple Spätzle proteins**

122 The cystine knot domains of *Drosophila* Spz-2 to Spz-6 were predicted based on their  
123 amino acid sequences (Fig EV1A). Among the six Spz proteins, Spz, Spz-2 and Spz-5 share  
124 high similarities (Spz shares 63% and 71% similarities with Spz-2 and Spz-5, respectively, and  
125 Spz-2 shares 62% similarity with Spz-5) (Fig EV1B), and these three proteins are  
126 phylogenetically more closely related. Through co-immunoprecipitation (Co-IP) assays, we  
127 previously showed that Toll receptors interact with the active cystine knot domains of Spätzles  
128 but not the full-length pro-Spätzles [37]. We expressed recombinant Toll<sup>ecto</sup>, Toll-7<sup>ecto</sup>  
129 (ectodomains), Toll and Toll-7 (full-length receptors) as well as the cystine knot domains of  
130 Spz to Spz-6 in S2 cells. Toll<sup>ecto</sup>, Toll-7<sup>ecto</sup> and the six Spz proteins were detected in both the  
131 cell culture media and the cell lysates, whereas full-length Toll and Toll-7 were detected only  
132 in the cell lysates and not in the cell culture media (Fig EV2). Co-IP assays showed that Toll<sup>ecto</sup>  
133 interacted with Spz, Spz-2 and Spz-5 but not with Spz-3, Spz-4 or Spz-6 (Fig 2A-D), whereas  
134 Toll-7<sup>ecto</sup> interacted with Spz, Spz-2, Spz-5 and Spz-6 but not with Spz-3 or Spz-4 (Fig 2E-H).  
135 These findings suggested that Toll and Toll-7 can bind to multiple Spz ligands.

### 136 **Multiple Toll-Spz and Toll-7-Spz pairs activate the *drosomycin* promoter in S2 cells**

137 To determine whether multiple pairs of Spz proteins with Toll or Toll-7 can trigger  
138 signaling pathways, dual luciferase assays were performed. The co-expression of Toll with  
139 Spz, Spz-2 and Spz-5 activated the *drosomycin* promoter, and the highest activity was obtained  
140 with Toll-Spz, followed by Toll-Spz-2 and Toll-Spz-5 (Fig 3A). In addition, the co-expression  
141 of Toll-7 with Spz, Spz-2 and Spz-5 also activated the *drosomycin* promoter, and the highest  
142 activity was observed with Toll-7-Spz-2, followed by Toll-7-Spz-5 and Toll-7-Spz (Fig 3B).

143 These results are consistent with those obtained with the interaction of Toll and Toll-7 with  
144 Spz, Spz-2 and Spz-5 (Fig 2). We also confirmed that the overexpression of Tolls (Toll, Toll-2  
145 and Toll-7) or Spz proteins (Spz, Spz-2 and Spz-5) alone, and the co-expression of Toll-2 and  
146 Spz (non-functional pair) did not activate the *drosomycin* promoter, and that only the  
147 co-expression of the correct pairs of Toll and Spz proteins (Toll-Spz, Toll-7-Spz and  
148 Toll-7-Spz-5) activated the *drosomycin* promoter (Fig 3C). The expression or co-expression of  
149 all these proteins did not activate the *diptericin* promoter (Fig 3).

150 **Ectodomains of Toll and Toll-7 recognize VSV, and VSV infection activates AMP gene**  
151 **promoters**

152 Toll-7 can recognize VSV but is not involved in the anti-VSV response [25,26]. We  
153 first determined whether Toll can also recognize VSV. Toll<sup>ecto</sup> and Toll-7<sup>ecto</sup> were  
154 overexpressed in S2 cells and secreted into the cell culture media, and the VSV glycoprotein  
155 (VSV-G) was detected in the virus-infected DMEM cell culture media (Fig 4A). When the cell  
156 culture media containing Toll<sup>ecto</sup> and Toll-7<sup>ecto</sup> were mixed with VSV virions and the  
157 V5-tagged ectodomains were pulled down by anti-V5 antibody, Toll<sup>ecto</sup> and Toll-7<sup>ecto</sup> were  
158 detected in the immunoprecipitated proteins (Fig 4B), and VSV-G was also detected in the  
159 Co-IP proteins (Fig 4C), indicating that both Toll<sup>ecto</sup> and Toll-7<sup>ecto</sup> recognize VSV through  
160 interaction with VSV-G. When stable S2 cell lines expressing full-length Toll and Toll-7 were  
161 transfected with AMP gene promoter reporters, the activity of the AMP gene promoters,  
162 including *drosomycin* and *attacin* promoters, were significantly activated by VSV infection



163 (Fig 4D and E), suggesting that the recognition of VSV by Toll and Toll-7 can activate AMP  
164 genes.

165 **Toll and Toll-7 play differential roles in male and female flies to defend against bacterial,**  
166 **fungal and VSV infection**

167 To verify the functions of Toll and Toll-7 in *Drosophila* immunity, wild-type ( $w^{1118}$ )  
168 flies, various Toll mutants ( $Tlr^{632}/Tl^{I-RXA}$  and  $Tl^{I-RXA}/TM6B$ ) and Toll-7 mutants ( $Toll-7^{g1-5}/CyO$   
169 and  $Df(2R)BSC22/Toll-7^{g1-5}$ ) were infected with the pathogenic bacteria *E. faecalis* and *P.*  
170 *aeruginosa*, *C. albicans*, or VSV-GFP, and the cumulative survival of the flies was recorded. In  
171  $w^{1118}$  flies, *Toll* was expressed at a slightly lower level than *Toll-7* in males but at a significantly  
172 higher level than *Toll-7* in females (Fig EV4A). Therefore, septic infection assays were  
173 separately performed in male and female flies. Compared with  $w^{1118}$  flies, all four mutant males  
174 and the two *Toll* mutant females were significantly more susceptible to *E. faecalis* infection  
175 (Fig 5A and E). In addition, the two *Toll* mutant males were significantly more susceptible to  
176 *E. faecalis* infection than the two *Toll-7* mutant males (Fig 5A), and the two *Toll-7* mutant  
177 males were significantly more susceptible to *P. aeruginosa* infection than the two *Toll* mutant  
178 males (Fig 5B). Moreover, all four mutant males and the two *Toll* mutant females were  
179 significantly more susceptible to *C. albicans* infection (Fig 5C and G), and the  $Df/Toll-7^{g1-5}$  and  
180  $Tlr^{632}/Tl^{I-RXA}$  males and all four mutant females were significantly more susceptible to  
181 VSV-GFP infection (Fig 5D and H). Additionally, the two *Toll* mutant females were  
182 significantly more susceptible to VSV-GFP infection than the two *Toll-7* mutant females (Fig  
183 5H). The detection of *gfp* transcript expression in the VSV-GFP infected flies revealed no

184 significant differences among the  $w^{1118}$ ,  $Df/Toll-7^{g1-5}$  and  $Tlr^{632}/Tl^{RXA}$  flies at days 1, 5 and 10  
185 post-infection (Fig EV3), indicating that the VSV-GFP titer remains at a similar level in these  
186 flies even 10 days after infection. Taken together, these results suggest that Toll and Toll-7 are  
187 required for both *Drosophila* males and females in defense against microbial infections.  
188 Whether Toll or Toll-7 plays a major/minor role may be related to the differential expression of  
189 *Toll* and *Toll-7* transcripts in  $w^{1118}$  males and females (Fig EV4A) and the induced/reduced  
190 expression of *Toll*, *Toll-7* (Fig EV4B-I) and AMP genes (Fig EV5) in mutant flies after  
191 microbial infection. For example, *Toll-7* was expressed at a significantly lower level in all four  
192 mutant females than in the  $w^{1118}$  females after microbial infection (Fig EV4F-I), but *Toll* was  
193 induced in the two *Toll* mutant females after *E. faecalis* infection (Fig EV4F) and in the  
194 *Toll-7<sup>g1-5</sup>/CyO* females after *P. aeruginosa* (Fig EV4G) and *C. albicans* infection (Fig  
195 EV4H). *Toll-7* was significantly up-regulated in the two *Toll* mutant males after *P.*  
196 *aeruginosa* (Fig EV4C) and *C. albicans* (Fig EV4D) infection and in the  $Tl^{RXA}/TM6B$  males  
197 after *E. faecalis* infection (Fig EV4B) compared with  $w^{1118}$  males. *Drosomycin* was expressed  
198 at a significantly lower level in all four mutant flies compared with the  $w^{1118}$  flies after *E.*  
199 *faecalis* infection (Fig EV5A and E) but was significantly up-regulated in the *Toll-7<sup>g1-5</sup>/CyO*  
200 and the two *Toll* mutant flies compared with the  $w^{1118}$  flies after VSV-GFP infection (Fig  
201 EV5D and H).

202

203 **Discussion**

204           Among the nine *D. melanogaster* Tolls [16,17] and six Spätzles [18], only Toll and  
205 Spz have been well studied [3]. Although there are reports about Toll-2, Toll-5, Toll-8 and  
206 Toll-9 in activation of AMPs expression [19-23,38,39], there has been no reports about Spz-2  
207 to Spz-6 as ligands for Tolls in immune signaling pathways. We report here that Spz, Spz-2  
208 and Spz-5 formed multiple Spz-Toll pairs with Toll and Toll-7, and multiple Spz-Toll and  
209 Spz-Toll-7 complexes activated *drosomycin* promoter, suggesting multiple *Drosophila*  
210 Toll-Spz pathways in regulating the expression of antimicrobial peptide genes.

211           In 2000, Tauszig et al. [16] compared eight *Drosophila* Tolls (Toll to Toll-8) in  
212 activation of AMP gene promoters. They expressed chimeric Tolls, in which each of the TIR  
213 domain from Toll-2 to Toll-8 was fused to the truncated extracellular domain of Toll, as the  
214 truncated Toll (Toll<sup>ΔLRR</sup>) that has the leucine-rich repeats (LRRs) deleted is an active receptor  
215 independence of Spz ligand [40]. Among the five chimeric Tolls (Toll-2, Toll-5 to Toll-8) that  
216 were expressed in S2 cells, only expression of chimeric Toll-5 activated *drosomycin* promoter  
217 activity to about 25% of that activated by Toll<sup>ΔLRR</sup>, and expression of all five chimeric Tolls  
218 and Toll<sup>ΔLRR</sup> did not activate *dipteracin*, *defensin* and *cecropin* promoters [16]. We expressed  
219 only the TIR domains (without the extracellular and transmembrane domains) of Toll to Toll-9  
220 and found that expression of all nine TIRs activated *drosomycin* promoter to some extents, with  
221 high activity observed with TIR of Toll, followed by TIRs of Toll-7 and Toll-4. As an active  
222 receptor without ligand binding, Toll<sup>ΔLRR</sup> must be able to form dimers/oligomers. It is possible  
223 that except chimeric Toll-5, the other four chimeric Tolls (Toll-2, Toll-6 to Toll-8) could not  
224 form stable dimers/oligomers, while free TIRs expressed in the cytoplasm in our study may

225 easily form dimers/oligomers. Expression of all TIRs did not activate *dipteracin* promoter, a  
226 result consistent with that from expression of chimeric Tolls [16].

227 Toll-6 and Toll-7 can function as neurotrophin receptors in the development of the  
228 central nervous system in *Drosophila* and may interact with Spz-2 and Spz-5, respectively  
229 [24]. We showed that Toll-7 interacted with Spz-6, but that co-expression of Toll-7 with Spz-6  
230 did not activate the *drosomycin* promoter, suggesting that Toll-7-Spz-6 may play a role in  
231 development. Multiple pairs of Spz-Toll-7 in activation of *drosomycin* promoter as well as  
232 Toll-7 mutant male and female flies were significantly more susceptible to microbial infection  
233 suggest that Toll-7, like Toll, play roles in both innate immunity and development.

234 Toll-7 can recognize *vesicular stomatitis* virus (VSV) to induce anti-viral autophagy  
235 response [25], but it is not required for anti-VSV infection [26]. We confirmed that Toll-7  
236 recognized VSV through binding to VSV glycoprotein. In addition, we showed that Toll also  
237 bound VSV glycoprotein, and binding of VSV to Toll and Toll-7 activated AMP gene  
238 promoters. Septic infections with different pathogens in  $w^{1118}$ , *Toll* and *Toll-7* mutant flies  
239 suggest that Toll and Toll-7 differentially affect adult male and female flies in defense against  
240 infection by *E. faecalis*, *P. aeruginosa*, *C. albicans* and VSV. As Toll and Toll-7 both play a  
241 role in defense against microbial infection, the survival of male and female flies after septic  
242 infections depends on the overall effect of differential expression levels of *Toll*, *Toll-7* and  
243 AMP genes. The titers of VSV-GFP (determined by the *gfp* transcript) in  $w^{1118}$ , *Toll* and *Toll-7*  
244 mutant flies maintained at the similar levels at day 1, 5 and 10 post-infection in each fly line as

245 well as among the three fly lines, indicating that Toll and Toll-7, though play roles in defense  
246 against VSV infection, may not play a role in restricting VSV replication.

247           We demonstrated the existence of multiple Toll-Spz pathways in *Drosophila* innate  
248 immunity, which raises more questions that need to be answered. What are the functions of  
249 different Toll-Spz and Toll-7-Spz pairs in *Drosophila* immunity? How pro-Spz-2 and  
250 pro-Spz-5 are processed/activated (particularly pro-Spz-2, which requires two proteolytic  
251 cleavages)? Are Spz-2 and Spz-5 processed by SPE or/and other unidentified proteases?  
252 What is the function of Toll-7-Spz-6? Future research will focus on answering some of these  
253 questions.

## 254 **Materials and Methods**

### 255 **Fly stocks**

256 Wild-type  $w^{1118}$  flies were obtained from the laboratory of Dr. Leonard Dobens  
257 (School of Biological Sciences, University of Missouri – Kansas City, Missouri, USA). The  
258  $Toll-7^{g1-5}/CyO$  mutant line was a gift from Dr. Yashimasa Yagi (Division of Biological  
259 Science, Nagoya University, Nagoya, Japan), and the  $Toll-7^{g1-5}$  mutant line was created by  
260 homologous recombination of an ends-in knockout system followed by hs-ICreI treatment to  
261 generate a  $Toll-7$  knockout line with a point mutation [17]. The  $Toll-7^{g1-5}$  line was balanced  
262 over  $CyO$  to obtain the  $Toll-7^{g1-5}/CyO$  mutant line, and heterozygotes were screened based on  
263 the existence of curled wings. The  $Tlr^{632}/Tl^{I-RXA}$  and  $Tl^{I-RXA}/TM6B$  Toll (also called Toll-1)  
264 mutant lines were obtained from the laboratory of Dr. Kontoyiannis (Department of  
265 Infectious Diseases, University of Texas M. D. Anderson Cancer Center, Houston, Texas,  
266 USA) [41].  $Tlr^{632}/Tl^{I-RXA}$  flies were generated by crossing  $Tlr^{632}/TM6B$  and  $Tl^{I-RXA}/TM6B$   
267  $Toll$ -deficient flies.  $Tlr^{632}$  is a thermosensitive loss-of-function allele with a strong phenotype  
268 at 29°C; thus, these flies were maintained at 29°C during infection. Both the  $Tlr^{632}$  and  $Tl^{I-RXA}$   
269 mutant lines were balanced over  $TM6B$  and were recognized by multiple hair-type bristle in  
270 the upper lateral thorax/torso. The  $Df(2R)BSC22/SM6a$  line (stock # 6647) was purchased  
271 from Bloomington Stock Center (Indiana, USA); in this line, the 56D7 – 56F12 chromosome  
272 segment was deleted by exploiting hybrid element insertion (HEI) and resolution, and this  
273 line was later balanced over  $SM6a$  to obtain flies that can be recognized by curly wings. We  
274 generated  $Df(2R)BSC22/Toll-7^{g1-5}$  flies by crossing  $Toll-7^{g1-5}/CyO$  and  $Df(2R)BSC22/SM6a$

275 flies, which uncovers the *Toll-7* locus to obtain *Toll-7* mutants that can be screened by the  
276 presence of curly wings. All the flies were cultured on corn-meal diet [42] and transferred to  
277 fresh food at least 24 h prior to injection/infection.

## 278 **Gene cloning**

279 The nine *Drosophila* Toll clones are available in Dr. Y. Tony Ip laboratory at the  
280 University of Massachusetts Medical School, Worcester, MA, USA [17]. All these clones  
281 were genomic DNAs cloned in the pAC5.1-A vectors and might thus contain introns. For this  
282 study, we cloned Toll cDNA using the total RNA from *Drosophila* adult females as the  
283 template and Toll-7 cDNA using the pAC5.1-A clone, which did not contain any introns, as  
284 the template. All nine *Drosophila* Toll TIR domains and *M. sexta* Toll TIR domain [37], the  
285 ectodomains of Toll and Toll-7 and full-length Toll and Toll-7 were amplified by PCR using  
286 the forward and reverse primers listed in Table 1 and cloned into the pMT/BiP/V5-His A  
287 vector (V413020, Invitrogen) for expression of the recombinant proteins with a V5-tag at the  
288 C-terminus. Active Spz to Spz-6 proteins (Fig EV1A) were amplified by PCR and cloned  
289 into a modified pMT/Bip A vector [37] for expression of the recombinant Spz proteins with a  
290 Flag-tag at the N-terminus. The PCR reactions were performed with the following conditions:  
291 94°C for 3 min, 35 cycles of 94°C for 30 s, Tm-5°C for 30 s, 72°C for 30 s to 4 min, and final  
292 extension at 72°C for 10 min. The PCR products were recovered using an Agarose Gel  
293 Electrophoresis-Wizard® SV Gel and PCR Clean-Up System (A9285, Promega) and then  
294 subcloned into the T-Easy vector (A1360, Promega). Recombinant plasmid DNAs were  
295 purified using a PureYield™ Plasmid Miniprep System (A1222, Promega) according to the

296 manufacturer's instructions and digested with respective restriction enzymes, and DNA  
297 fragments were recovered and inserted into the pMT/BiP/V5-His A or modified pMT/Bip A  
298 vector using T4 DNA ligase (M0202L, NEB). The recombinant expression plasmids were then  
299 purified and sequenced in the sequencing facility at University of Missouri – Columbia for  
300 further experiments.

### 301 ***Vesicular stomatitis virus stock culture***

302 *Vesicular stomatitis virus* (VSV) expressing green fluorescent protein (VSV-GFP), in  
303 which GFP is inserted between the 3' leader and N gene [43], was obtained from the laboratory  
304 of Dr. Whelan (Harvard Medical School, Boston, Massachusetts, USA) [44]. VSV-GFP was  
305 cultured and maintained in HEK293 cells in DMEM medium supplemented with 10%  
306 heat-inactivated fetal bovine serum (#10082063, Invitrogen) and 1% penicillin-streptomycin  
307 solution (G6784, Sigma-Aldrich). The viral titer was measured by plaque assay using HEK293  
308 cells [45]. For infection assays with *Drosophila* S2 cells, 10,000 pfu/ml VSV-GFP was used,  
309 and for the infection assays with adult flies, 10,000 pfu of VSV-GFP (in 50 nl of PBS) were  
310 injected into each fly.

### 311 **Infection assays**

312 *Drosophila* adult males and females (5-7 days of age) in a batch of 20-30 flies were  
313 infected with the Gram-positive bacterium *Enterococcus faecalis* V583 (a gift from Dr.  
314 Michael Gilmore, Harvard Medical School, Boston, Massachusetts, USA), the Gram-negative  
315 bacterium *Pseudomonas aeruginosa* PA-14 (a gift from Dr. Kalai Mathee, Florida  
316 International University, Florida, USA), the fungus *Candida albicans* (a gift from Dr.



317 Theodore White, School of Biological Sciences at the University of Missouri – Kansas City,  
318 Missouri, USA), or VSV-GFP. Briefly, overnight bacterial and fungal cultures were diluted  
319 to  $OD_{600} = 0.2$  and  $OD_{600} = 0.5$ , respectively, washed with phosphate buffered saline (PBS,  
320 pH 7.4) and resuspended in PBS for injection. Flies were anesthetized with  $CO_2$  (for no  
321 longer than 15 min at a time), and 50 nl of diluted *E. faecalis* V583, *P. aeruginosa* PA-14, *C.*  
322 *albicans*, or VSV-GFP (10,000 pfu/50 nl) was injected into each fly at the left intra-thoracic  
323 region using a Drummond nanoinjector and pulled glass capillary needles. These flies were  
324 maintained in clean bottles with fresh cornmeal diet, and the diet was changed every day  
325 throughout the course of the experiment. The flies that died within 3 h of injection were  
326 excluded from the study due to death by injury. The flies were monitored every hour (or  
327 every day in the VSV-GFP infection assay), and the numbers of dead males and females were  
328 recorded. The accumulation of VSV-GFP RNA in the  $w^{1118}$ , *Df(2R)BSC22/Toll-7<sup>g1-5</sup>* and  
329 *Tlr<sup>632</sup>/Tl<sup>L-RXA</sup>* flies infected with VSV-GFP at day 1, 5 and 10 post-infection was detected by  
330 real-time PCR analysis of the *gfp* transcript using primers for GFP (Table 1).

331 For the infection of *Drosophila* S2 cells with VSV-GFP, S2 cells were grown and  
332 maintained in insect cell culture media (SH30610.02, HyClone) supplemented with 10%  
333 heat-inactivated fetal bovine serum, 1% penicillin-streptomycin solution and 1% Gibco  
334 L-Glutamine (25030081, Thermo Fisher Scientific, complete growth medium). VSV-GFP  
335 was cultured in HEK293 cells as described above, and the replication of VSV-GFP was  
336 detected by Western blot analysis using anti-VSV-G antibody. A stable S2 cell line  
337 expressing either full-length Toll or Toll-7 receptor (described below) was transiently

338 transfected with pGL3B or the pGL3B-*attacin*, pGL3B-*dipteracin*, pGL3B-*drosomycin* or  
339 pGL3B-*metchnikowin* AMP gene promoter individually using Gencarrier-2 (#31-00110,  
340 Epoch Biolabs). Forty-eight hours after protein expression, the S2 cells were infected with  
341 10,000 pfu/ml VSV-GFP for 24 h and processed for dual luciferase assay (see below).

#### 342 **Transient transfection and establishment of stable S2 cell lines**

343 Transient transfection experiments and the establishment of stable S2 cell lines  
344 expressing full-length Toll and Toll-7 were performed as described previously [37]. For  
345 transient transfections, S2 cells were seeded overnight in complete growth medium (see  
346 above), washed with serum-free medium (SH30278.01, HyClone), and transiently transfected  
347 using GenCarrier-2™ transfection reagent (#31-00110, Epoch Biolabs) according to the  
348 manufacturer's instructions. DES®-Inducible/Secreted Kit with pCoBlast (K5130-01,  
349 Invitrogen) was used for the establishment of stable S2 cell lines. To select stable S2 cells  
350 expressing recombinant Toll and Toll-7, pCoBlast (Invitrogen) was co-transfected with  
351 recombinant pMT/BiP/V5-His A vectors. Forty-eight hours after transfection, S2 cells were  
352 centrifuged and resuspended in the complete growth medium containing 25 µg/ml Blasticidin  
353 S hydrochloride (No.15205, Sigma-Aldrich). Resistant colonies appeared one week later.

#### 354 **Dual luciferase assays**

355 Dual luciferase assays were performed as described previously [46]. S2 cells were  
356 plated in 24-well culture plates ( $3 \times 10^5$  cells/well) overnight in the complete growth medium,  
357 washed with serum-free medium, and then transiently co-transfected with recombinant  
358 pMT/BiP/V5-His A expression plasmid (500 ng), pGL3B, pGL3B-*drosomycin* or

359 pGL3B-*diptericin* firefly luciferase reporter plasmid (250 ng), or Renilla luciferase reporter  
360 plasmid (25 ng) (as an internal standard) (pRL-TK, Promega) with Gencarrier-2. After  
361 overnight transfection, serum-free medium was replaced with the complete growth medium  
362 containing copper sulfate (to a final concentration of 500  $\mu$ M) for protein expression, and 36 h  
363 after protein expression, the firefly luciferase and Renilla luciferase activities were measured  
364 using the Dual-Luciferase Reporter Assay System (E1980, Promega) with a GloMax® Multi  
365 Microplate Luminometer (Promega). The relative luciferase activity (RLA) was obtained as  
366 the ratio of firefly luciferase activity to Renilla luciferase activity. The RLA obtained for S2  
367 cells co-transfected with empty pMT/BiP/V5-His A and pGL3B (empty reporter vector)  
368 plasmids was used as the calibrator. These experiments were repeated at least three times (three  
369 independent biological samples or three independent cell cultures), and a representative set of  
370 data was used to prepare the figures.

### 371 **Co-immunoprecipitation (Co-IP) Assays**

372 Co-immunoprecipitation (Co-IP) assays were performed as described previously [46].  
373 S2 cell lysates (300  $\mu$ l, approximately equivalent to  $10^6$  cells) or equivalent cell culture media  
374 containing recombinant proteins were precleared with Protein G Sepharose (50% slurry,  
375 No.17-0618-01, GE Healthcare) prior to Co-IP assays. Cell lysates or cell lysates combined  
376 with cell culture media were mixed with anti-Flag M2 or anti-V5 antibody (final concentration  
377 of 1  $\mu$ g/ $\mu$ l), and these mixtures were incubated at 4°C for 10 h with gentle rocking. Protein G  
378 Sepharose (30  $\mu$ l of 50% slurry) in lysis buffer was added to the protein-antibody mixture, and  
379 the resulting mixture was incubated overnight at 4°C with gentle rocking. The Sepharose beads

380 containing immunoprecipitated proteins were collected after centrifugation, washed three  
381 times with lysis buffer, resuspended in 50  $\mu$ l of 1  $\times$  SDS sample buffer, boiled at 95°C for 5  
382 min, and used for subsequent Western blot analysis using anti-Flag M2 or anti-V5 antibody as  
383 the primary antibody as described above [46].

384 Co-immunoprecipitation (Co-IP) assays were also performed by mixing S2 cell culture  
385 medium containing Toll<sup>ecto</sup> or Toll-7<sup>ecto</sup> proteins collected 48 h after protein expression with  
386 DMEM cell culture medium from VSV-GFP-infected HEK293 cells (containing VSV-GFP  
387 virions) as described above, and the interaction of Toll<sup>ecto</sup> or Toll-7<sup>ecto</sup> with VSV-GFP was  
388 detected by anti-V5 or anti-VSV glycoprotein (anti-VSV-G) antibody [P5D4] (ab50549,  
389 Abcam, USA, 1:5000 dilution).

### 390 **Western blot analysis**

391 Western blot analysis of transiently transfected S2 cells or stable S2 cell lines ( $5 \times 10^6$   
392 cells/well) was performed in six-well plates 48 h after the induction of protein expression by  
393 copper sulfate (final concentration of 250  $\mu$ M). The cell culture media (2 ml each) and S2 cells  
394 were collected, and the S2 cells were homogenized in 400  $\mu$ l of lysis buffer (50 mM Tris-HCl,  
395 pH 7.4, 150 mM NaCl, 5 mM EDTA, 1% NP-40, and 0.5 mM PMSF) containing protease  
396 inhibitor cocktail (P8340, Sigma-Aldrich) following a previously described protocol [46]. The  
397 cell homogenates were sonicated briefly and centrifuged, and the supernatants (cell lysates)  
398 were collected. The cell culture media (10  $\mu$ l from a total volume of 2 ml) and cell lysate (10  $\mu$ l  
399 from a total volume of 400  $\mu$ l, equivalent to  $\sim 5 \times 10^4$  cells) were separated by 8%, 12% or 15%  
400 SDS-PAGE, and the proteins were transferred to nitrocellulose membranes (162-0097,

401 Bio-Rad) for Western blot analysis using anti-Flag M2 antibody (F-1804, Sigma-Aldrich,  
402 1:5000 dilution) or anti-V5 antibody (V-8012, Sigma-Aldrich, 1:5000 dilution) as the primary  
403 antibody and alkaline phosphatase-conjugated anti-mouse antibody (A4312, Sigma-Aldrich,  
404 1:10,000) as the secondary antibody as described previously [47]. The signal was developed  
405 using an Alkaline Phosphatase (AP)-Conjugate Color Development Kit (#170-6432, Bio-Rad).

#### 406 **Real-time PCR analysis**

407 The total RNA from flies and S2 cells was extracted, and the expression of target  
408 genes was determined by real-time PCR as described previously [37]. The flies were  
409 anesthetized on a CO<sub>2</sub> bed, placed in 1.5-ml tubes and homogenized with disposable pestles  
410 in 1 ml of TRIzol® Reagent (T9424, Sigma-Aldrich), and the total RNA from flies and S2  
411 cells was extracted according to the manufacturer's instructions. The RNA pellets were  
412 air-dried and resuspended in 50 µl of nuclease-free water, and the concentration of RNA was  
413 determined using a Nanodrop UV-Vis spectrophotometer (ND-1000, Thermo).

414 Total RNA (2 µg from each sample) was treated with RQ1 RNase-free DNase  
415 (M6101, Promega) to remove contaminated genomic DNA and then used for the synthesis of  
416 cDNAs in 25 µl reactions using Moloney murine leukemia virus (M-MLV) reverse  
417 transcriptase (M1701, Promega) and an anchor-oligo(dT)18 primer following the  
418 manufacturer's instructions. The cDNA sample (diluted 1:50) was used as the template for  
419 quantitative real-time PCR analysis. The *Drosophila* ribosomal protein 49 (*rp49*) gene was  
420 used as an internal standard to normalize the expression of target mRNA. Real-time PCR was  
421 performed in 20 µl reactions containing 10 µl of 2×SYBR® GreenER™ qPCR SuperMix

422 Universal (No. 204141, Qiagen), 4  $\mu$ l of H<sub>2</sub>O, 4  $\mu$ l of diluted cDNA template, and 1  $\mu$ l (10  
423 pmol) of each of the forward and reverse primers. The real-time PCR program was 2 min at  
424 50°C, 10 min at 95°C, 40 cycles of 95°C for 15 s and 60°C for 1 min, and the dissociation  
425 curve analysis. The data from three replicates of each sample were analyzed with a  
426 comparative method ( $2^{-\Delta\Delta CT}$ ) using ABI 7500 SDS software (Applied Biosystems). The  
427 baseline was automatically set by the software to maintain consistency. The cDNA sample  
428 from S2 cells transfected with empty pMT/BiP/V5-His A plasmid or wild-type flies ( $w^{1118}$ )  
429 was used as the calibrator. The expression level of target genes was calculated by the  $2^{-\Delta\Delta CT}$   
430 method [48], which provides the n-fold difference in relative expression compared with the  
431 calibrator. All the data are presented as relative mRNA expression levels, and all the  
432 experiments were repeated at least three times.

### 433 **Data analysis**

434 Three to four replicates of all the experiments were performed, and the experiments  
435 were repeated with three to four independent biological samples. The means from a typical  
436 dataset were used for the figures, which were prepared using GraphPad Prism (GraphPad,  
437 San Diego, California, USA). The statistical significance of the differences was calculated by  
438 one-way ANOVA followed by Tukey's multiple comparison test using GraphPad Prism with  
439 identical letters for a non-significant difference ( $p > 0.05$ ) whereas different letters for a  
440 significant difference ( $p < 0.05$ ). The significance of the difference was also determined by an  
441 unpaired t-test using GraphPad InStat software with \*  $p < 0.05$ , \*\*  $p < 0.01$ , and \*\*\*  $p <$   
442 0.001.

443 **Acknowledgements**

444 This work was supported by the National Natural Science Foundation of China (No.  
445 31472019) and University of Missouri – Kansas City Funding for Excellence.

446

447 **Author contributions**

448 XY designed the experiments, analyzed data, interpreted results, and participated in  
449 manuscript writing; MC performed most experiments, analyzed data, interpreted results, and  
450 participated in manuscript writing; CL performed some experiments and analyzed data; ZH  
451 and YL helped perform some experiments; XL and YW participated in manuscript writing;  
452 YI and MS helped interpret results and participated in manuscript writing.

453

454 **Conflict of interest**

455 The authors declare that they have no conflict of interest.

456 **References:**

- 457 1. Hergannan JA, Reichhart JV (1997) *Drosophila* immunity. *Trends Cell Biol* **7**: 309-316
- 458 2. Yi H, Chowdhury M, Huang Y-D, Yu X-Q (2014) Insect antimicrobial peptides and their  
459 applications. *Appl Microbiol Biotechnol* **98**: 5807-22.
- 460 3. Lemaitre B, Nicolas E, Michaut L, Reichhart JM, Hoffmann JA (1996) The dorsoventral  
461 regulatory gene cassette spatzle/Toll/cactus controls the potent antifungal response in  
462 *Drosophila* adults. *Cell* **86**: 973-983
- 463 4. Anderson KV, Jurgens G, Nusslein-Volhard C (1985) Establishment of dorsal-ventral  
464 polarity in the *Drosophila* embryo: genetic studies on the role of the Toll gene product.  
465 *Cell* **42**: 779-789
- 466 5. Leulier F, Lemaitre B (2008) Toll-like receptors--taking an evolutionary approach. *Nat*  
467 *Rev Genet* **9**: 165-178
- 468 6. Akira S, Uematsu S, Takeuchi O (2006) Pathogen recognition and innate immunity. *Cell*  
469 **124**: 783-801
- 470 7. Chao W (2009) Toll-like receptor signaling: a critical modulator of cell survival and  
471 ischemic injury in the heart. *Am J Physiol Heart Circ Physiol* **296**: H1-12
- 472 8. Li X, Jiang S, Tapping RI (2010) Toll-like receptor signaling in cell proliferation and  
473 survival. *Cytokine* **49**: 1-9
- 474 9. Rock FL, Hardiman G, Timans JC, Kastelein RA, Bazan JF (1998) A family of human  
475 receptors structurally related to *Drosophila* Toll. *Proc Natl Acad Sci USA* **95**: 588-593
- 476 10. Jin MS, Lee J-O (2008) Structures of TLR–ligand complexes. *Curr Opin Immunol* **20**:  
477 414-419
- 478 11. Morisato D, Anderson KV (1994) The spätzle gene encodes a component of the  
479 extracellular signaling pathway establishing the dorsal-ventral pattern of the *Drosophila*  
480 embryo. *Cell* **76**: 677-88.
- 481 12. Weber AN, Tauszig-Delamasure S, Hoffmann JA, Lelievre E, Gascan H, Ray KP, Morse  
482 MA, Imler JL, Gay NJ (2003) Binding of the *Drosophila* cytokine Spatzle to Toll is direct  
483 and establishes signaling. *Nat Immunol* **4**: 794-800
- 484 13. Takeuchi O, Akira S (2010) Pattern recognition receptors and inflammation. *Cell* **140**:  
485 805-820
- 486 14. Kawai T, Akira S (2006) TLR signaling. *Cell Death Differ* **13**: 816-825
- 487 15. Bilak H, Tauszig-Delamasure S, Imler JL (2003) Toll and Toll-like receptors in  
488 *Drosophila*. *Biochem Soc Trans* **31**: 648-651
- 489 16. Tauszig S, Jouanguy E, Hoffmann JA, Imler J-L (2000) Toll-related receptors and the  
490 control of antimicrobial peptide expression in *Drosophila*. *Proc Natl Acad Sci USA* **97**:  
491 10520-10525
- 492 17. Yagi Y, Nishida Y, Ip YT (2010) Functional analysis of Toll-related genes in *Drosophila*.  
493 *Dev Growth Differ* **52**: 771-783
- 494 18. Parker JS, Mizuguchi K, Gay NJ (2001) A family of proteins related to Spatzle, the toll  
495 receptor ligand, are encoded in the *Drosophila* genome. *Proteins* **45**: 71-80
- 496 19. Ligoxygakis P, Bulet P, Reichhart JM (2002) Critical evaluation of the role of the  
497 Toll-like receptor 18-Wheeler in the host defense of *Drosophila*. *EMBO Rep* **3**: 666-673



- 498 20. Williams MJ, Rodriguez A, Kimbrell DA, Eldon ED (1997) The *18-wheeler* mutation  
499 reveals complex antibacterial gene regulation in *Drosophila* host defense. *EMBO J* **16**:  
500 6120-6130
- 501 21. Akhouayri I, Turc C, Royet J, Charroux B (2011) Toll-8/Tollo negatively regulates  
502 antimicrobial response in the *Drosophila* respiratory epithelium. *PLoS Pathog* **7**:  
503 e1002319
- 504 22. Bettencourt R, Tanji T, Yagi Y, Ip YT (2004) Toll and Toll-9 in *Drosophila* innate  
505 immune response. *J Endotoxin Res* **10**: 261-268
- 506 23. Ooi JY, Yagi Y, Hu X, Ip YT (2002) The *Drosophila* Toll-9 activates a constitutive  
507 antimicrobial defense. *EMBO Rep* **3**: 82-87
- 508 24. McIlroy G, Foldi I, Aurikko J, Wentzell JS, Lim MA, Fenton JC, Gay NJ, Hidalgo A  
509 (2013) Toll-6 and Toll-7 function as neurotrophin receptors in the *Drosophila*  
510 *melanogaster* CNS. *Nat Neurosci* **16**: 1248-1256
- 511 25. Nakamoto M, Moy RH, Xu J, Bambina S, Yasunaga A, Shelly SS, Gold B, Cherry S  
512 (2012) Virus recognition by Toll-7 activates antiviral autophagy in *Drosophila*. *Immunity*  
513 **36**: 658-667
- 514 26. Lamiable O, Arnold J, de Faria IJ, Olmo RP, Bergami F, Meignin C, Hoffmann JA,  
515 Marques JT, Imler JL (2016) Analysis of the contribution of hemocytes and autophagy to  
516 *Drosophila* antiviral immunity. *J Virol* **90**: 5415-5426
- 517 27. Imler JL, Hoffmann JA (2000) Signaling mechanisms in the antimicrobial host defense of  
518 *Drosophila*. *Curr Opin Microbiol* **3**: 16-22
- 519 28. Meng X, Khanuja BS, Ip YT (1999) Toll receptor-mediated *Drosophila* immune response  
520 requires Dif, an NF-kappaB factor. *Genes Dev* **13**: 792-797
- 521 29. Rutschmann S, Jung AC, Hetru C, Reichhart JM, Hoffmann JA, Ferrandon D (2000) The  
522 Rel protein DIF mediates the antifungal but not the antibacterial host defense in  
523 *Drosophila*. *Immunity* **12**: 569-580
- 524 30. DeLotto Y, DeLotto R (1998) Proteolytic processing of the *Drosophila* Spatzle protein by  
525 easter generates a dimeric NGF-like molecule with ventralising activity. *Mech Dev* **72**:  
526 141-148
- 527 31. Levashina EA, Langley E, Green C, Gubb D, Ashburner M, Hoffmann JA, Reichhart J-M  
528 (1999) Constitutive activation of Toll-mediated antifungal defense in Serpin-deficient  
529 *Drosophila*. *Science* **285**: 1917-1919
- 530 32. Jang IH, Chosa N, Kim SH, Nam HJ, Lemaitre B, Ochiai M, Kambris Z, Brun S,  
531 Hashimoto C, Ashida M, *et al.* (2006) A Spatzle-processing enzyme required for toll  
532 signaling activation in *Drosophila* innate immunity. *Dev Cell* **10**: 45-55
- 533 33. Hu X, Yagi Y, Tanji T, Zhou S, Ip YT (2004) Multimerization and interaction of Toll and  
534 Spätzle in *Drosophila*. *Proc Natl Acad Sci USA* **101**: 9369-9374
- 535 34. Parthier C, Stelter M, Ursel C, Fandrich U, Lilie H, Breithaupt C, Stubbs MT (2014)  
536 Structure of the Toll-Spatzle complex, a molecular hub in *Drosophila* development and  
537 innate immunity. *Proc Natl Acad Sci USA* **111**: 6281-6286
- 538 35. Horng T, Medzhitov R (2001) *Drosophila* MyD88 is an adapter in the Toll signaling  
539 pathway. *Proc Natl Acad Sci USA* **98**: 12654-12658

- 540 36. Tauszig-Delamasure S, Bilak H, Capovilla M, Hoffmann JA, Imler JL (2002) *Drosophila*  
541 MyD88 is required for the response to fungal and Gram-positive bacterial infections. *Nat*  
542 *Immunol* **3**: 91-97
- 543 37. Zhong X, Xu XX, Yi HY, Lin C, Yu XQ (2012) A Toll-Spätzle pathway in the Tobacco  
544 Hornworm, *Manduca sexta*. *Insect Biochem Mol Biol* **42**: 514-524
- 545 38. Luo C, Shen B, Manley JL, Zheng L (2001) Tshao functions in the Toll pathway in  
546 *Drosophila melanogaster*: possible roles in development and innate immunity. *Insect Mol*  
547 *Biol* **10**: 457-464
- 548 39. Narbonne-Reveau K, Charroux B, Royet J (2011) Lack of an antibacterial response defect  
549 in *Drosophila* Toll-9 mutant. *PLoS One* **6**: e17470
- 550 40. Winans KA, Hashimoto C (1995) Ventralization of the *Drosophila* embryo by deletion of  
551 extracellular leucine-rich repeats in the Toll protein. *Mol Biol Cell* **6**: 587-596
- 552 41. Lionakis MS, Kontoyiannis DP (2012) *Drosophila melanogaster* as a model organism for  
553 invasive aspergillosis. *Methods Mol Biol* **845**: 455-468
- 554 42. Moy RH, Gold B, Molleston JM, Schad V, Yanger K, Salzano MV, Yagi Y, Fitzgerald  
555 KA, Stanger BZ, Soldan SS, Cherry S (2014) Antiviral autophagy restricts Rift Valley  
556 fever virus infection and is conserved from flies to mammals. *Immunity* **40**: 51-65
- 557 43. Schott DH, Cureton DK, Whelan SP, Hunter CP (2005) An antiviral role for the RNA  
558 interference machinery in *Caenorhabditis elegans*. *Proc Natl Acad Sci USA* **102**:  
559 18420-18424
- 560 44. Heinrich BS, Cureton DK, Rahmeh AA, Whelan SPJ (2010) Protein expression redirects  
561 *Vesicular Stomatitis Virus* RNA synthesis to cytoplasmic inclusions. *PLoS Pathog* **6**:  
562 e1000958
- 563 45. Baer A, Kehn-Hall K (2014) Viral concentration determination through plaque assays:  
564 using traditional and novel overlay systems. *J Vis Exp* **93**: e52065
- 565 46. Zhong X, Chowdhury M, Li CF, Yu XQ (2017) Transcription factor Forkhead regulates  
566 expression of antimicrobial peptides in the Tobacco Hornworm, *Manduca sexta*. *Sci Rep*  
567 **7**: 2688
- 568 47. Zhong X, Rao XJ, Yi HY, Lin XY, Huang XH, Yu XQ (2016) Co-expression of Dorsal  
569 and Rel2 negatively regulates antimicrobial peptide expression in the Tobacco Hornworm  
570 *Manduca sexta*. *Sci Rep* **6**: 20654
- 571 48. Livak KJ, Schmittgen TD (2001) Analysis of relative gene expression data using  
572 real-time quantitative PCR and the 2(-Delta Delta C(T)) Method. *Methods* **25**: 402-408

573 **Figure legends**

574 **Figure 1 - Activation of the *drosomycin* promoter through the overexpression of TIR**  
575 **domains.**

576 A, B Expression of V5-tagged TIR domains from *Drosophila* Toll to Toll-9 and *M. sexta*  
577 Toll in S2 cells detected by anti-V5 antibody.

578 C Relative luciferase activity of *drosomycin* and *dipteracin* promoter reporters in S2 cells  
579 overexpressing TIR domains.

580 Data information: In C, the graph shows mean  $\pm$  SEM, n=3; identical letters show a  
581 non-significant difference ( $p > 0.05$ ), whereas different letters indicate a significant  
582 difference ( $p < 0.05$ ), one-way ANOVA followed by Tukey's multiple comparison test.

583

584 **Figure 2 - Interaction of Toll and Toll-7 ectodomains with Spz proteins.**

585 Recombinant V5-tagged ectodomains of Toll and Toll-7 (Toll<sup>ecto</sup> and Toll-7<sup>ecto</sup>) and the  
586 Flag-tagged active cystine knot domains of Spz to Spz-6 were overexpressed in S2 cells  
587 separately, and cell lysates from Toll<sup>ecto</sup> (or Toll-7<sup>ecto</sup>) and one of the six Spz proteins were  
588 mixed for co-immunoprecipitation (Co-IP) assays. Lanes 1–6 were Spz to Spz-6 mixed with  
589 Toll<sup>ecto</sup> or Toll-7<sup>ecto</sup>.

590 A, E Anti-V5 antibody precipitated Toll<sup>ecto</sup> (A) and Toll-7<sup>ecto</sup> (E) proteins, and these were  
591 detected with anti-V5 monoclonal antibody.

592 B, F Spz proteins co-immunoprecipitated with Toll<sup>ecto</sup> (B) and Toll-7<sup>ecto</sup> (F) and were detected  
593 with anti-Flag monoclonal antibody.

594 C, G Anti-Flag antibody precipitated Spz proteins, and these were detected with anti-Flag  
595 antibody.

596 D, H Toll<sup>ecto</sup> (D) and Toll-7<sup>ecto</sup> (H) co-immunoprecipitated with Spz proteins and were detected  
597 with anti-V5 antibody.

598

599 **Figure 3 - Activation of the *drosomyacin* promoter by multiple pairs of Toll-Spz and**  
600 **Toll-7-Spz.**

601 A-C The relative luciferase activity of the *drosomyacin* or *dipteracin* promoter reporter in S2  
602 cells overexpressing full-length Toll and one of the six Spz proteins (A), overexpressing Toll-7  
603 with one of the six Spz proteins (B), or overexpressing individual Toll or Spz proteins or  
604 different pairs of Toll and Spz proteins (C) was determined using a Dual-Luciferase® Reporter  
605 Assay System.

606 Data information: In (A-C), the graphs show mean  $\pm$  SEM, n=3; identical letters show a  
607 non-significant difference ( $p > 0.05$ ), whereas different letters indicate a significant difference  
608 ( $p < 0.05$ ), one-way ANOVA followed by Tukey's multiple comparison test.

609

610 **Figure 4 - Interaction of Toll and Toll-7 ectodomains with VSV and activation of AMP**  
611 **gene promoters by VSV infection.**

612 A Expression of Toll<sup>ecto</sup> (lane-1) and Toll-7<sup>ecto</sup> (lane-2) in S2 cell culture media detected by  
613 anti-V5 antibody, and detection of VSV glycoprotein (VSV-G) (lane 3) in the VSV-infected  
614 cell culture media with anti-VSV-G antibody.

615 B, C Interaction of Toll<sup>ecto</sup> and Toll-7<sup>ecto</sup> with VSV-G. V5-tagged Toll<sup>ecto</sup> and Toll-7<sup>ecto</sup> were  
616 mixed with VSV virions, and proteins were pulled down with anti-V5 antibody.  
617 Immunoprecipitated Toll<sup>ecto</sup> (lane-1) and Toll-7<sup>ecto</sup> (lane-2) were detected with anti-V5  
618 antibody (B), and co-immunoprecipitated VSV-G protein was detected with anti-VSV-G  
619 antibody (C).

620 D, E Activation of AMP gene promoter reporters in Toll and Toll-7 cell lines by VSV  
621 infection. Stable S2 cell lines expressing recombinant full-length Toll and Toll-7 were  
622 transfected with AMP gene promoter reporters and then infected with VSV. The relative  
623 luciferase activity was determined using a Dual-Luciferase<sup>®</sup> Reporter Assay System.

624 Data information: In (D, E), the graphs show mean  $\pm$  SEM, n=3; \*\*\*  $p < 0.001$ , unpaired t-test.

625

626 **Figure 5 - Toll and Toll-7 confer resistance to microbial infection in adult flies.**

627 A-H  $w^{1118}$ ,  $Toll-7^{g1-5}/CyO$ ,  $Df(2R)BSC22/Toll-7^{g1-5}$ ,  $Tl^{I-RXA}/TM6B$  and  $Tlr^{632}/Tl^{I-RXA}$  mutant  
628 males (A-D) and females (E-H) were infected with *E. faecalis*, *P. aeruginosa*, *C. albicans* and  
629 VSV-GFP, and the cumulative survival of the flies was recorded.

630 Data information: In (A-H), \*  $p < 0.05$ , \*\*  $p < 0.01$  and \*\*\*  $p < 0.001$ ; 'ns' for not significant

631 difference when compared with  $w^{1118}$ , unpaired t-test.

**Table 1. Primers used in this study**

| <b>For cloning</b> | <b>Forward Primers (5'→3')</b>                                     | <b>Names</b>                     | <b>Reverse Primers (5'→3')</b>          |
|--------------------|--------------------------------------------------------------------|----------------------------------|-----------------------------------------|
| DmToll-KpnI-N      | ATGGTACCAATGAGTCGACTAAAGGCC                                        | DmToll-ApaI-C                    | ATGGGCCCTACGTCGCTCTGTTTGGC              |
| DmToll-7-KpnI-N    | CGGGGTACCAATGGCGGCAATCCTGCTGCT                                     | DmToll-7-NotI-C                  | GAATGCGGCCGCTTCACCAGATACGCCTGAACAT      |
| DmToll-KpnI-N      | ATGGTACCAATGAGTCGACTAAAGGCC                                        | DmToll <sup>ect0</sup> -ApaI-C   | ATGGGCCCGAACACGCCCTTTTCCGCCGG           |
| DmToll-7-KpnI-N    | CGGGGTACCAATGGCGGCAATCCTGCTGCT                                     | DmToll-7 <sup>ect0</sup> -NotI-C | GAATGCGGCCGCTTATACGATTCTGGGATACCATGCT   |
| MsTIR-KpnI-N       | ATGGTACCACCGTACGACGCGTTTGTGTCTTTTCGCACA                            | MsTIR-ApaI-C                     | ATGGGCCCTTTGTAGCAAGGACTCGCGCCCGGCCGCTGG |
| DmTIR-KpnI-N       | ATGGTACCAAAGTTCGATGCCTTCATCTCG                                     | DmTIR-ApaI-C                     | ATGGGCCCTACGTCGCTCTGTTTGGCA             |
| DmTIR-2-SpeI-N     | CTGGACTAGTATGATCATCCTGCACTCGGAGAA                                  | DmTIR-2-NotI-C                   | GAATGCGGCCGCTTGACCAGGAAAGCTTGCCGTT      |
| DmTIR-3-SpeI-N     | CTGGACTAGTATGAGGTTTCGATGCCTTTCTGGC                                 | DmTIR-3-NotI-C                   | GAATGCGGCCGCTTGCAACGTAGCTTGGTAGTAG      |
| DmTIR-4-SpeI-N     | CTGGACTAGTATGAAATACGATGCATTCCCTATC                                 | DmTIR-4-ApaI-C                   | AATGGGCCCTACCTTTGTTTCTGCATCTGA          |
| DmTIR-5-SpeI-N     | CTGGACTAGTATGACCTACGATGCCTTCATCTC                                  | DmTIR-5-NotI-C                   | GAATGCGGCCGCTTGATTAGCGGCCCCGCATGCTT     |
| DmTIR-6-SpeI-N     | CTGGACTAGTATGGATGCCTACTTCGCCTACAG                                  | DmTIR-6-NotI-C                   | GAATGCGGCCGCTTCGCCACAGGTTCTTCTGCTGA     |
| DmTIR-7-SpeI-N     | CTGGACTAGTATGGTGCTCCTGCATTCCGCCAA                                  | DmTIR-7-NotI-C                   | GAATGCGGCCGCTTCACCAGATACGCCTGAACAT      |
| DmTIR-8-SpeI-N     | CTGGACTAGTATGTTTCGACGCCTTCGTTTCGTA                                 | DmTIR-8-NotI-C                   | GAATGCGGCCGCTTCATGTGCAGATTTCTAGACG      |
| DmTIR-9-SpeI-N     | CTGGACTAGTATGTTTCATCAGCTACTGCCAGAA                                 | DmTIR-9-ApaI-C                   | AATGGGCCCAACACTGATCTCTCTGGAGT           |
| DmSpz-KpnI-N       | ATGGTACCCATGGACTACAAGGACGACGATGACAAGGC<br>GGCCGCTGTTGGTGGCTCAGACGA | DmSpz-PmeI-C                     | CGGTTTAAACTCACCCAGTCTTCAACGC            |
| DmSpz-2-KpnI-N     | GAATGCGGCCGCTCTCGATGCCTGCGAGTCGAAG                                 | DmSpz-2-PmeI-C                   | CGGTTTAAACCTAGCGATAACCATCCACTTGGC       |
| DmSpz-3-KpnI-N     | GAATGCGGCCGCTCTCGATGCCTGCGAGTCGAAG                                 | DmSpz-3-PmeI-C                   | CGGTTTAAACCTAGGGATTACATCTACAGA          |
| DmSpz-4-KpnI-N     | GAATGCGGCCGCTGGAGTAAATGCCTGTCCCGT                                  | DmSpz-4-PmeI-C                   | CTTTTAAACTTAGTCCTCCAAGAAATCGA           |
| DmSpz-5-KpnI-N     | GAATGCGGCCGCTCAAAGTCCGGGGCGCTCCAC                                  | DmSpz-5-PmeI-C                   | CGGTTTAAACTTAATTGGCGGCTATCGTGC          |
| DmSpz-6-KpnI-N     | GAATGCGGCCGCTTGTCACTACCTGGACGGCGG                                  | DmSpz-6-KpnI-C                   | CGGTTTAAACTCACAACCTCGGCCACCGACT         |
| pGL3B-Dpt-N        | GGGGTACCAGTAACTTTACTGATAAGACTTGGATTCTC                             | pGL3B-Dpt-C                      | GAAGATCTCTCAGTTGTTCTCAATTGAAGAAGCTG     |
| pGL3B-Drs-N        | GGGGTACCCAATGAAAGTGATAATACGAATTGACC                                | pGL3B-Drs-C                      | GAAGATCTATTGGAAAAGTTCTCACGGAGC          |
| pGL3B-Att-N        | GGGGTACCATACTTGCTCAAAACAAAACCACA                                   | pGL3B-Att-C                      | GAAGATCTGTTGCTGAACTGGATTGCTGG           |
| pGL3B-Met-N        | CGGGGTACCTTTCTTAGCCCAGTTCTTAGTTCTG                                 | pGL3B-Met-C                      | GGAAGATCTCTTAGCTCGGTGGCGGGAATTGATTG     |
| <b>For qPCR</b>    | <b>Forward Primers (5'-3')</b>                                     | <b>Names</b>                     | <b>Reverse Primers (5'-3')</b>          |
| DmDpt-N            | ATGACCATGAAGCCCCTCC                                                | DmDpt-C                          | ATTCAGTCCAATCTCCGGGC                    |
| DmDrs-N            | TACTTGTTTCGCCCTCTTCGC                                              | DmDrs-C                          | GGAGCGTCCCTCCTCCTTGC                    |
| DmRp49-N           | GCCCAAGGGTATCGACAACA                                               | DmRp49-C                         | ACCTCCAGCTCGCGCACGTT                    |
| DmToll-N           | TCCAGACCCAGATCAACTCC                                               | DmToll-C                         | TAGCCCAGCGAGCTAATGTT                    |
| DmToll-7-N         | AGTTCGAGTGCGAGTGCC                                                 | DmToll-7-C                       | TTGCATTGTTTCGCTGGCG                     |
| VSV-GFP-N          | TTTTCTGTCAGTGGAGAGGGT                                              | VSV-GFP-C                        | ATCTGGGTATCTCGCAAAGCA                   |

634 **Expanded View Figure legends**

635 **Figure EV1 - Amino acid sequences of *Drosophila* pro-Spätzle and cistine knot Spätzle**  
636 **proteins, and multiple sequence alignment of *Drosophila* Spz, Spz-2 and Spz-5.**

637 A The amino acid sequences of pro-Spz to pro-Spz-6 were obtained from the NCBI website  
638 (<https://www.ncbi.nlm.nih.gov/>) with the indicated accession numbers. The predicted cistine  
639 knot Spz domains were underlined.

640 B *Drosophila* cistine knot Spz, Spz-2 and Spz-5 domains (from Fig EV1A above) were aligned  
641 by Clustal Omega (<https://www.ebi.ac.uk/Tools/msa/clustalo/>). Identical residues are indicated  
642 by “\*”, highly conserved residues are indicated by “:”, and conserved residues are indicated by  
643 “.”.

644

645 **Figure EV2 - Expression of recombinant Toll, Toll-7 and six Spz proteins in S2 cells.**

646 A-D V5-tagged recombinant Toll, Toll-7, Toll<sup>ecto</sup> and Toll-7<sup>ecto</sup> as well as Flag-tagged active  
647 cistine knot Spz to Spz-6 proteins were expressed in S2 cells. Proteins in the cell culture media (A  
648 and B) and the cell lysates (C and D) were detected by anti-V5 (A and C) or anti-Flag (B and D)  
649 monoclonal antibody.

650

651 **Figure EV3 - Expression of *gfp* transcript in the flies infected with VSV-GFP.**

652 A, B *w*<sup>1118</sup>, *Df(2R)BSC22/Toll-7<sup>g1-5</sup>* and *Tlr*<sup>632</sup>/*Tl*<sup>RXA</sup> male and female flies were infected with  
653 VSV-GFP, and flies at 1, 5 and 10 days post-infection were collected for preparation of total  
654 RNAs. Replication of VSV-GFP in the flies was determined by expression of *gfp* transcript in the  
655 RNA samples by real-time PCR using *Drosophila* ribosomal protein 49 (*rp49*) gene as an internal  
656 standard, and relative expression of *gfp* in *w*<sup>1118</sup> males (A) or females (B) was arbitrarily set as 1.

657 No significant difference in the expression level of *gfp* among  $w^{1118}$ , *Df/Toll-7<sup>g1-5</sup>* and  
658 *Tlr<sup>632</sup>/Tl<sup>I-RXA</sup>* males (A) and female (B) was observed at days 1, 5 and 10 post-infection, and no  
659 significant difference in *gfp* expression level was observed in  $w^{1118}$ , *Df/Toll-7<sup>g1-5</sup>* or *Tlr<sup>632</sup>/Tl<sup>I-RXA</sup>*  
660 flies between days 1, 5 and 10 post-infection.

661 Data information: In (A, B), graphs show mean  $\pm$  SEM, n=3.

662

663 **Figure EV4 - Expression of *Toll* and *Toll-7* transcripts in  $w^{1118}$  and mutant flies after *E.***  
664 ***faecalis*, *P. aeruginosa*, *C. albicans*, and VSV-GFP infection.**

665 A Expression of *Toll* and *Toll-7* transcripts in the un-infected  $w^{1118}$  males and females. Real-time  
666 PCRs were performed using *Drosophila* ribosomal protein 49 (*rp49*) gene as an internal standard,  
667 and expression of *Toll* in  $w^{1118}$  males was arbitrarily set as 1.

668 B-I Expression of *Toll* and *Toll-7* transcripts in  $w^{1118}$ , *Toll-7<sup>g1-5</sup>/CyO*, *Df(2R)BSC22/Toll-7<sup>g1-5</sup>*,  
669 *Tl<sup>I-RXA</sup>/TM6B* and *Tlr<sup>632</sup>/Tl<sup>I-RXA</sup>* mutant males (B-E) and females (F-I) after *E. faecalis*, *P.*  
670 *aeruginosa*, *C. albicans* and VSV-GFP infection. Real-time PCRs were performed using  
671 *Drosophila rp49* gene as an internal standard and expression of *Toll* or *Toll-7* mRNA in  $w^{1118}$  flies  
672 after infection was arbitrarily set as 1.

673 Data Information: In (A-I), graphs show mean  $\pm$  SEM, n=3; identical letters are not significant  
674 difference ( $p > 0.05$ ), whereas different letters indicate significant difference ( $p < 0.05$ ), one-way  
675 ANOVA followed by Tukey's multiple comparison test; \*  $p < 0.05$ , \*\*  $p < 0.01$  and \*\*\*  $p <$   
676 0.001, unpaired t-test.



677 **Figure EV5 - Expression of *drosomycin* and *diptericin* transcripts in  $w^{1118}$  and mutant flies**  
678 **after *E. faecalis*, *P. aeruginosa*, *C. albicans*, and VSV-GFP infection.**

679 A-H Expression of *drosomycin* (*Drs*) and *diptericin* (*Dpt*) transcripts in  $w^{1118}$ , *Toll-7<sup>g1-5</sup>/CyO*,  
680 *Df(2R)BSC22/Toll-7<sup>g1-5</sup>*, *TI<sup>I-RXA</sup>/TM6B* and *Tlr<sup>632</sup>/TI<sup>I-RXA</sup>* mutant males (A-D) and females (E-H)  
681 after *E. faecalis*, *P. aeruginosa*, *C. albicans* and VSV-GFP infection. Real-time PCRs were  
682 performed using *Drosophila rp49* gene as an internal standard and expression of *Drs* or *Dpt* in  
683  $w^{1118}$  flies after infection was arbitrarily set as 1.

684 Data information: In (A-H), graphs show mean  $\pm$  SEM, n=3; identical letters are not significant  
685 difference ( $p > 0.05$ ), whereas different letters indicate significant difference ( $p < 0.05$ ), one-way  
686 ANOVA followed by Tukey's multiple comparison test.

**A**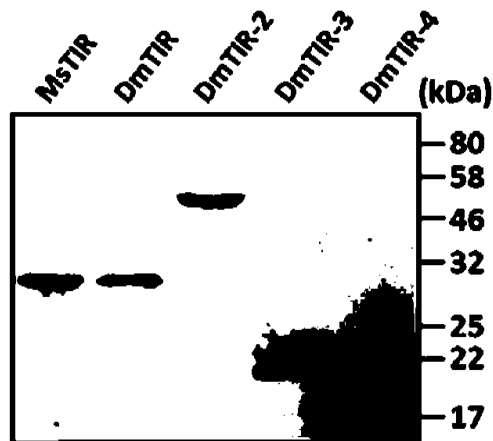**B**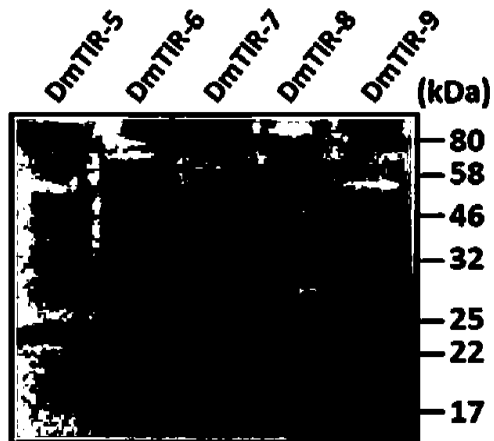**C**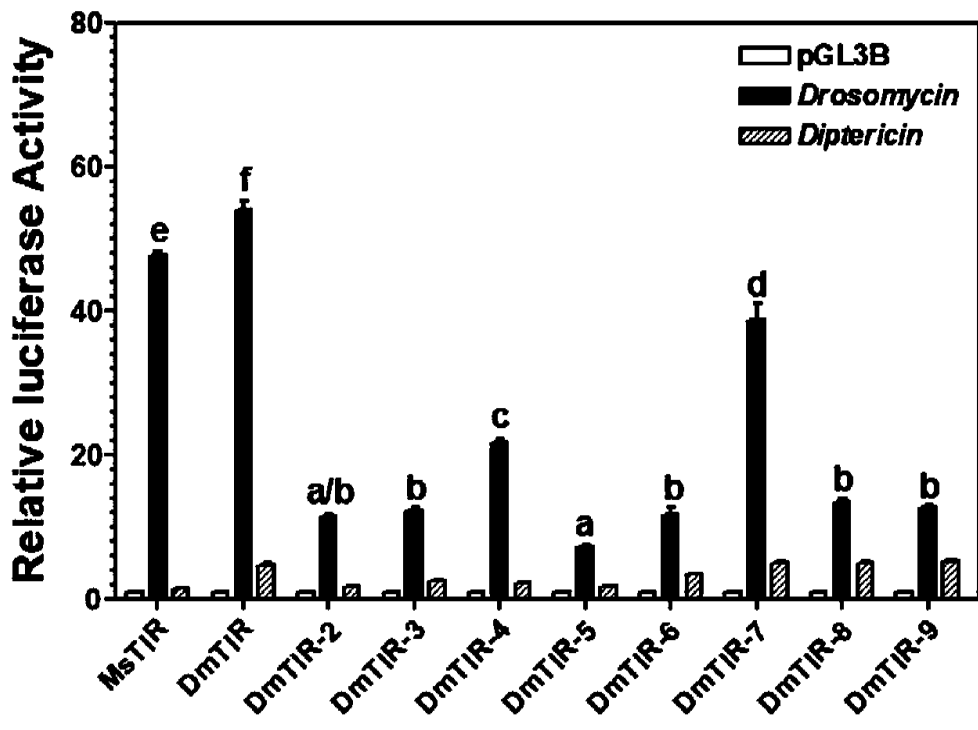

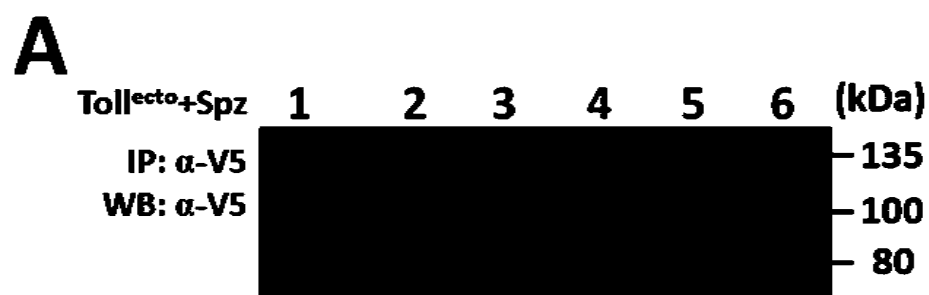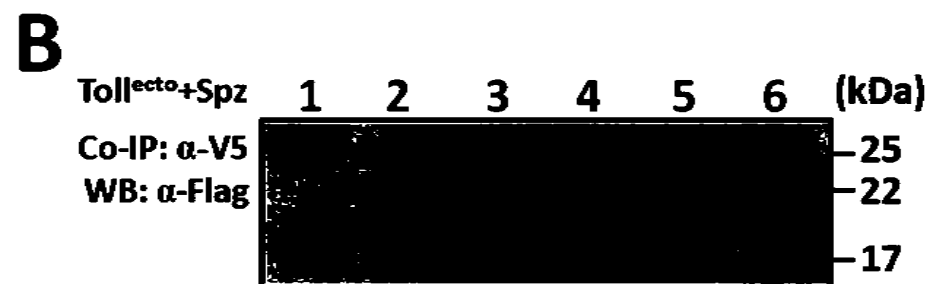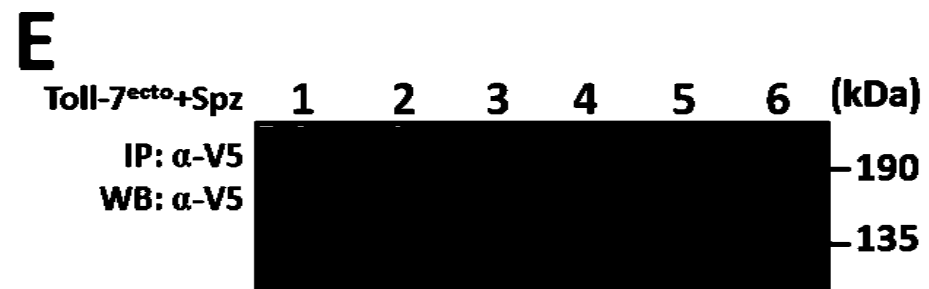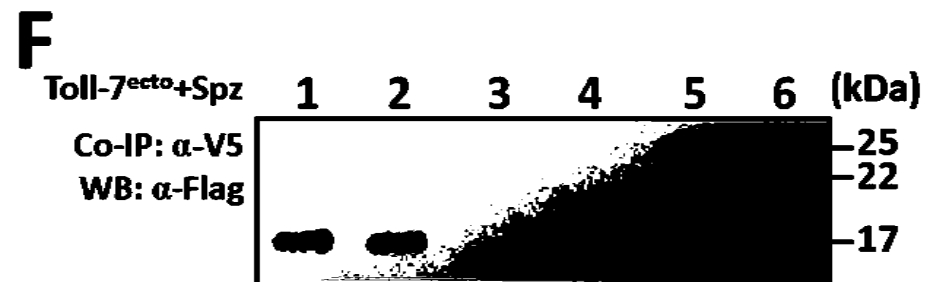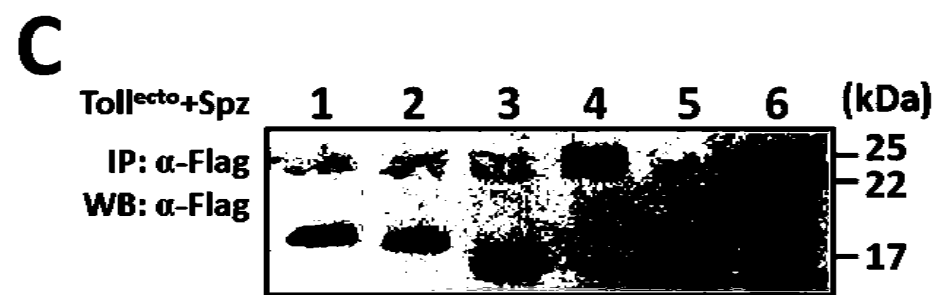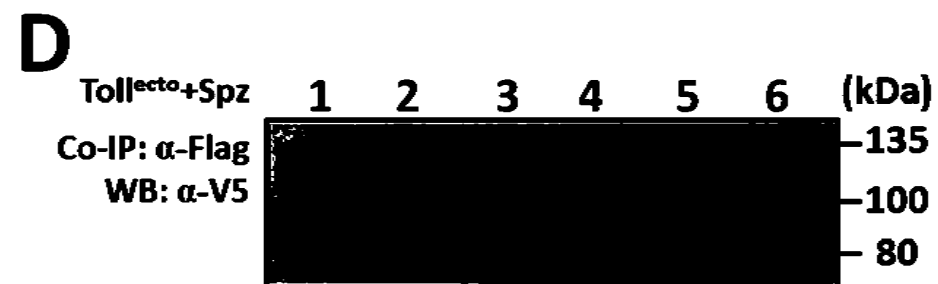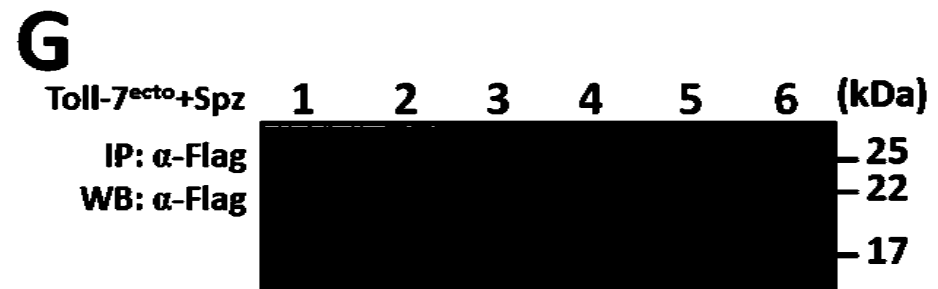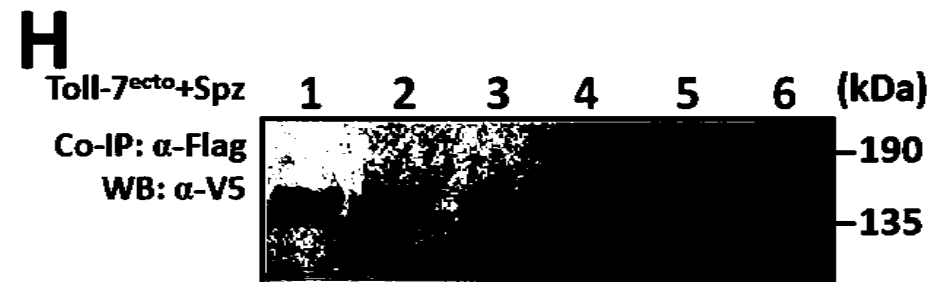

**A**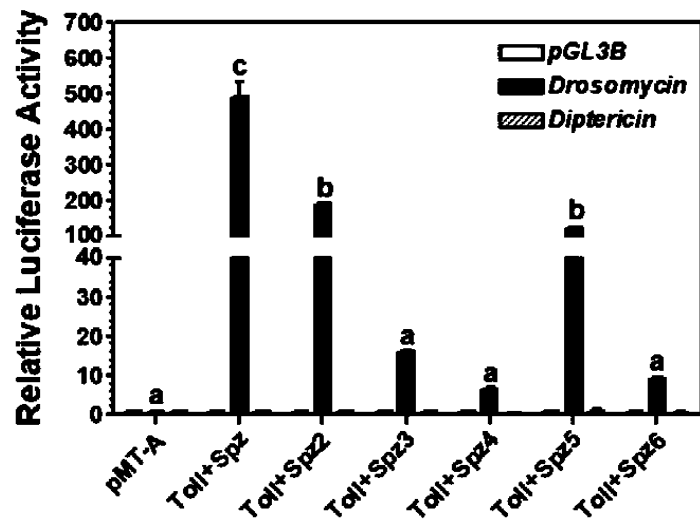**B**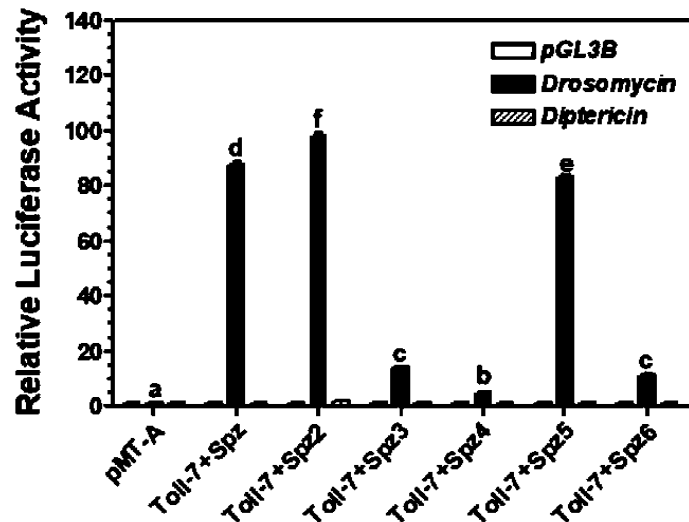**C**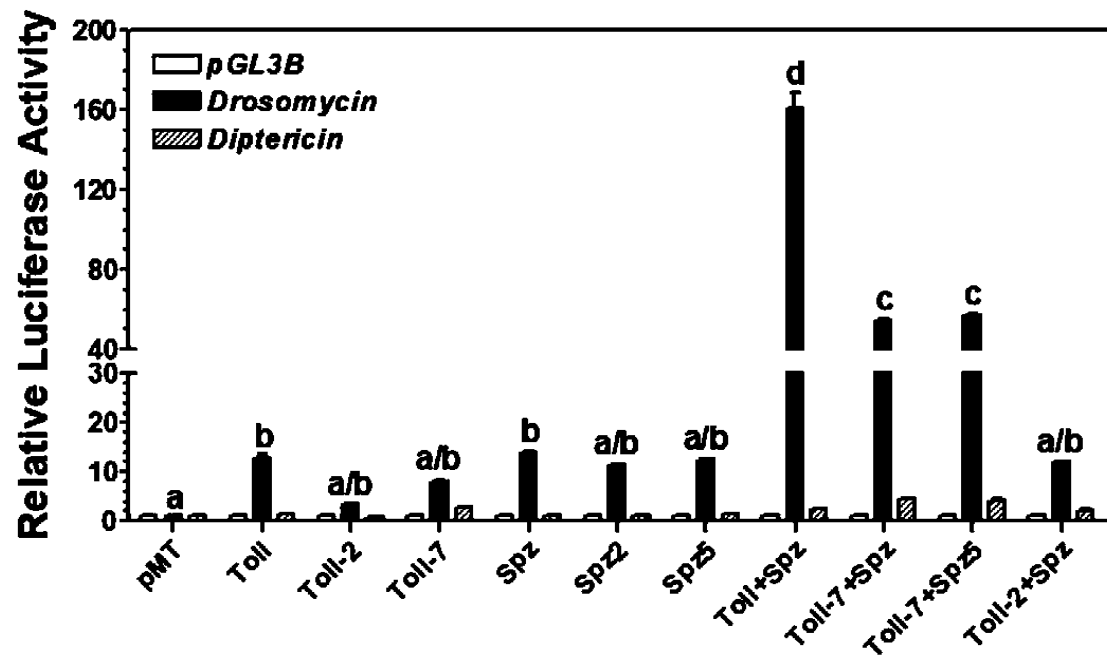

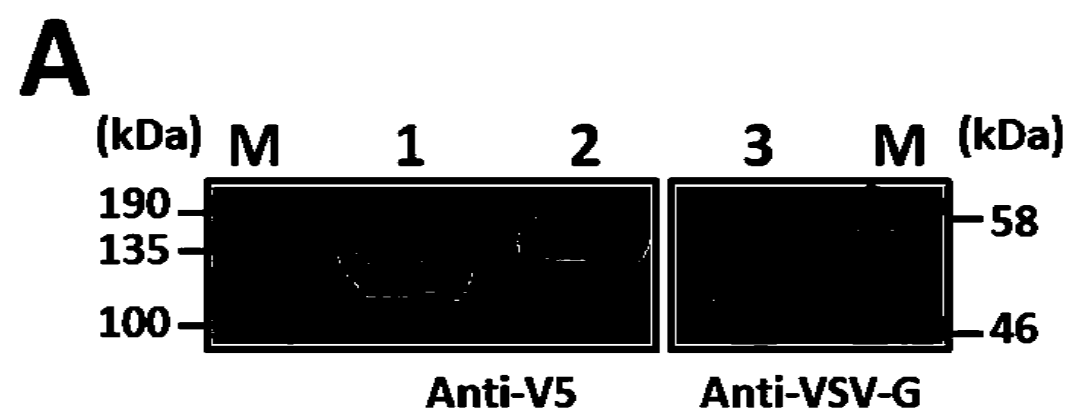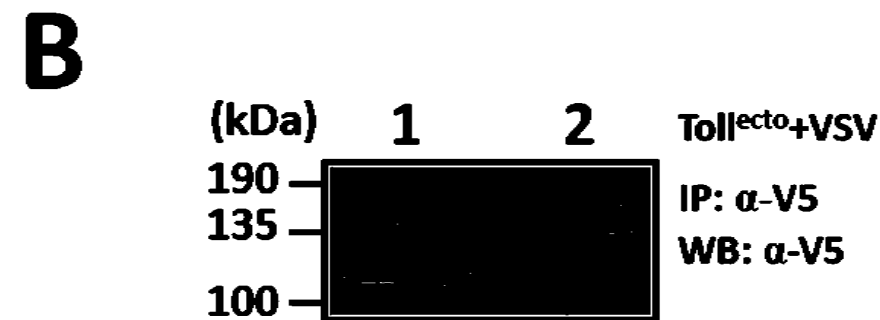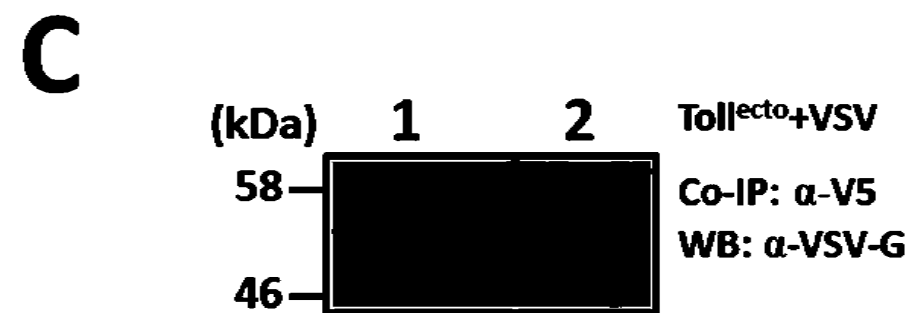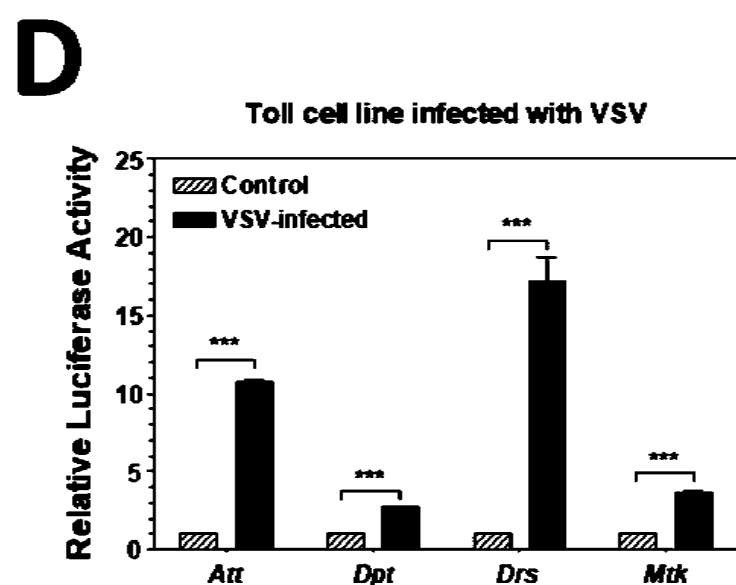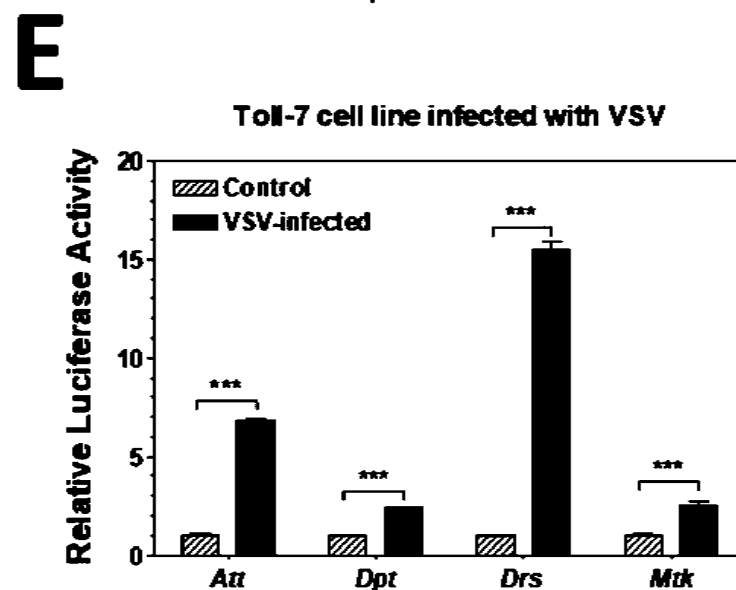

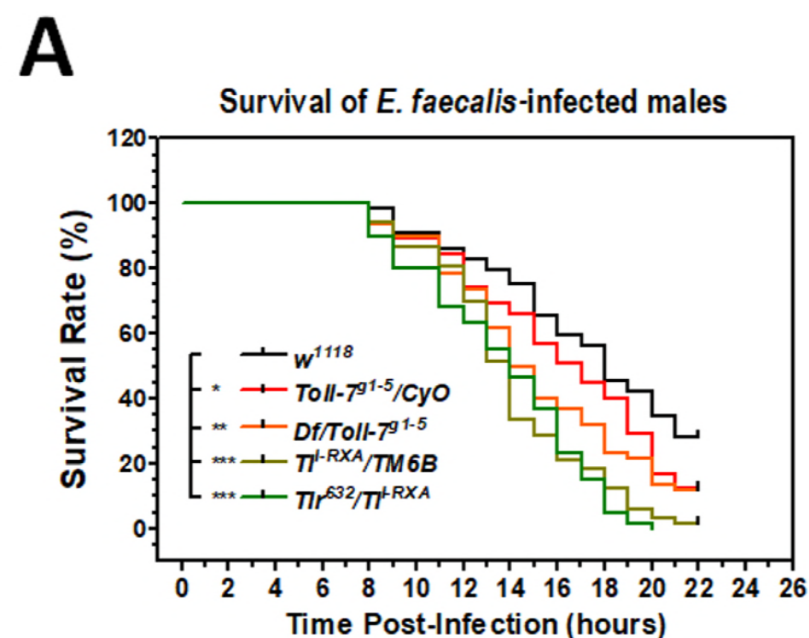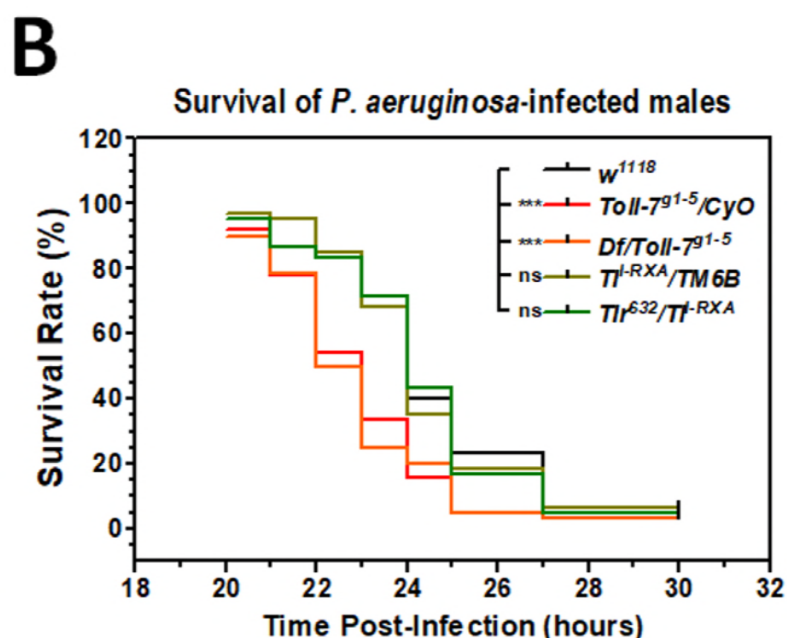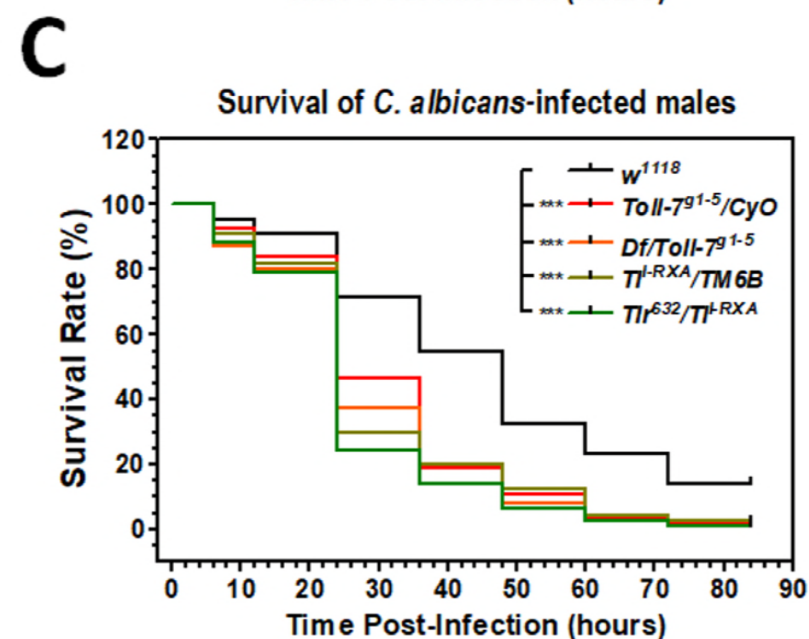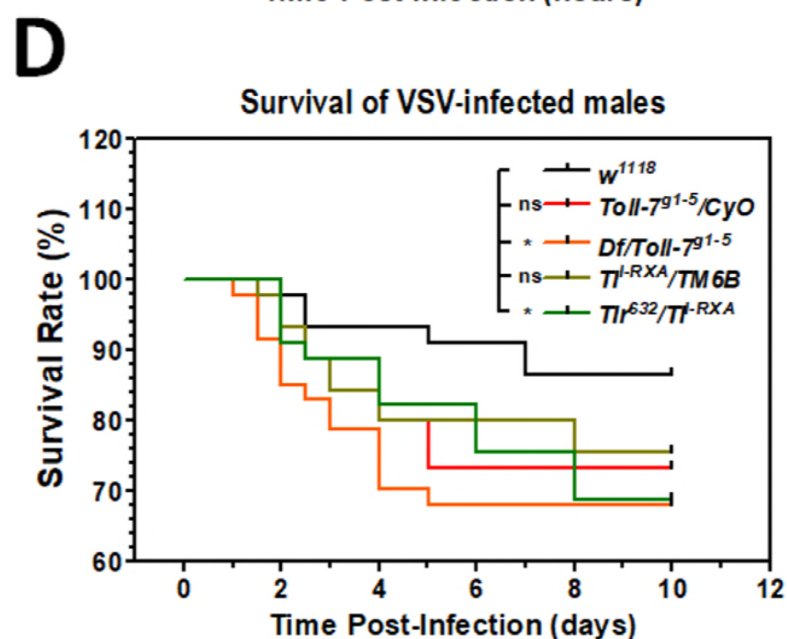

**E**Survival of *E. faecalis*-infected females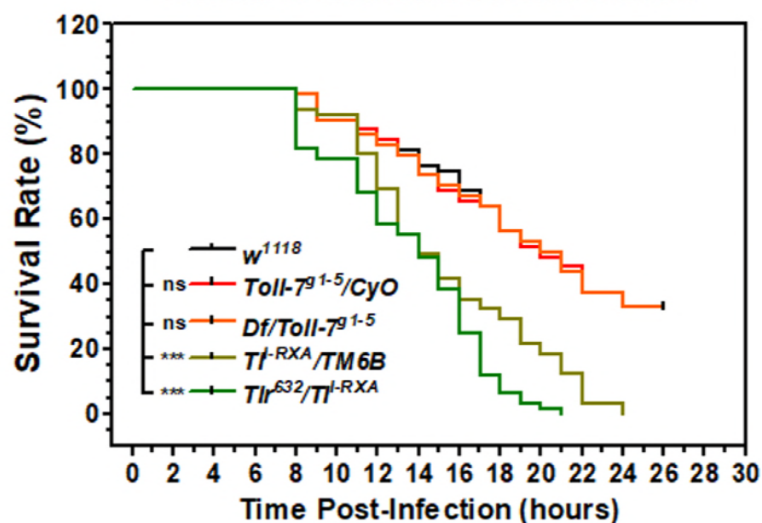**F**Survival of *P. aeruginosa*-infected females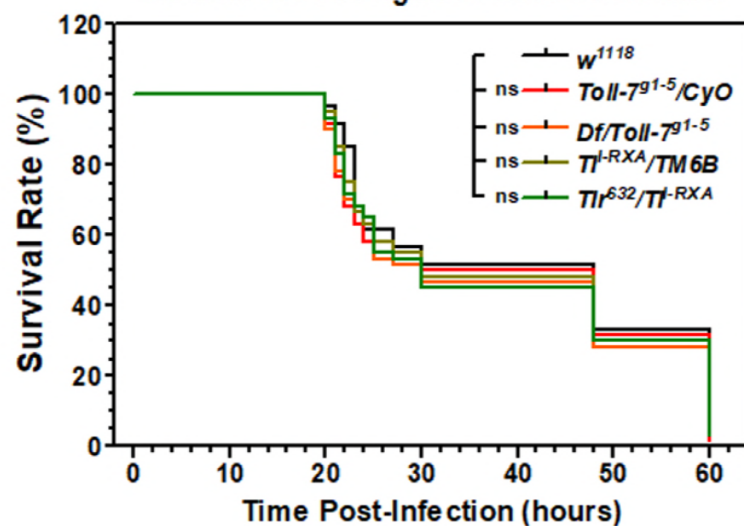**G**Survival of *C. albicans*-infected females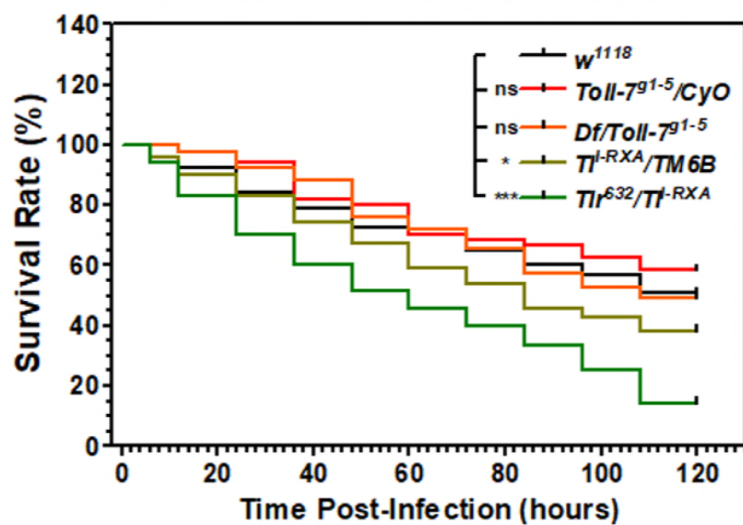**H**

Survival of VSV-infected females

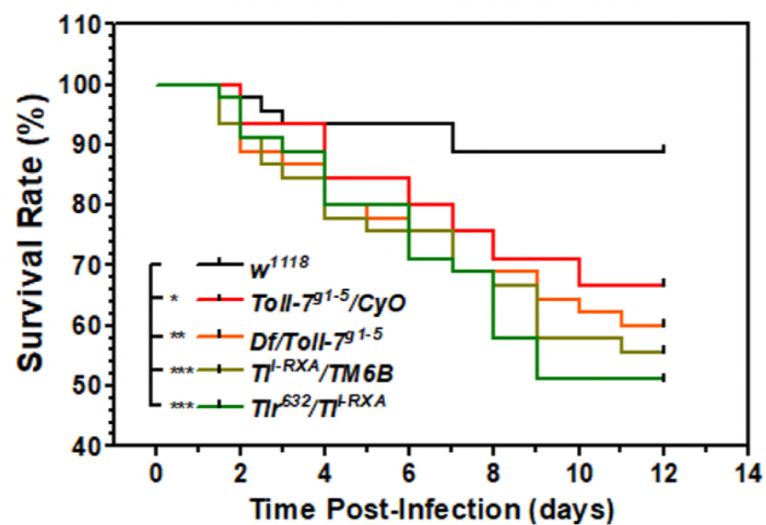

Source: http://biorxiv.org/content/10.1101/420679v1.full.pdf
